# Supplementary material for: SIN-Like Pathway Kinases Regulate the End of Mitosis in the Methylotrophic Yeast Ogataea polymorpha
Source: MDPI journal article supplement (doi:10.3390/cells11091519), 2022-04-30
Supplement: s1 [file s1]

A

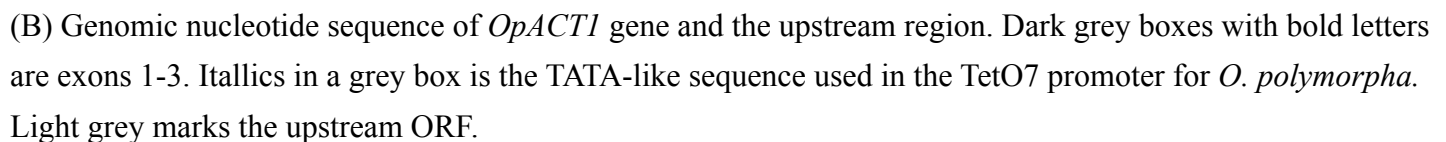

Figure S2

A

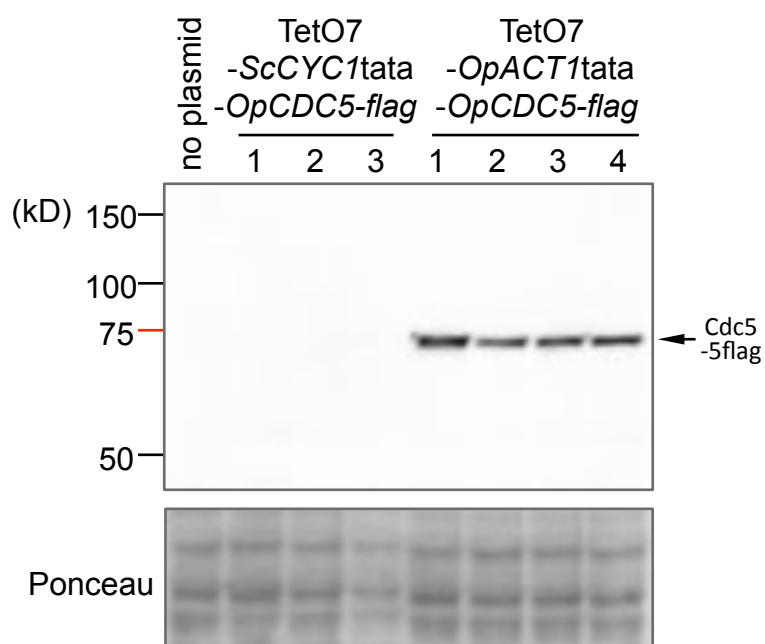

B

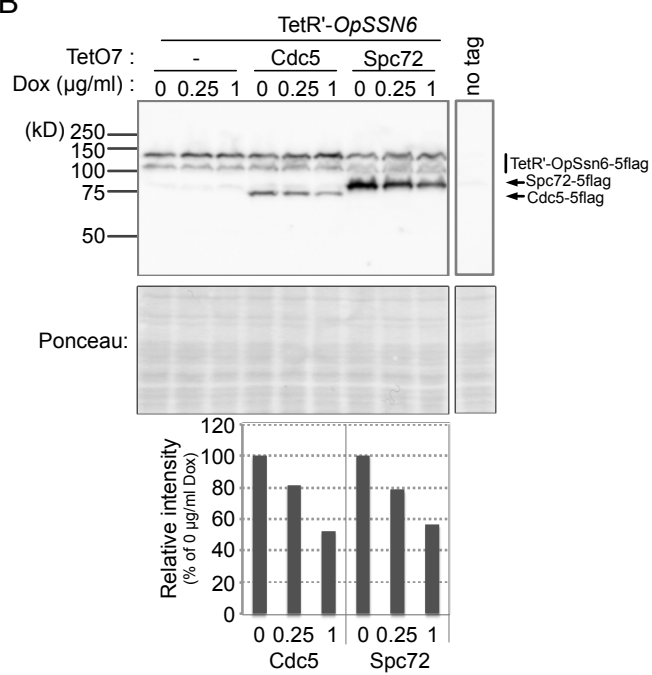

C

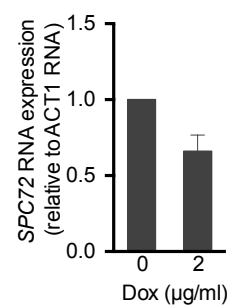

D

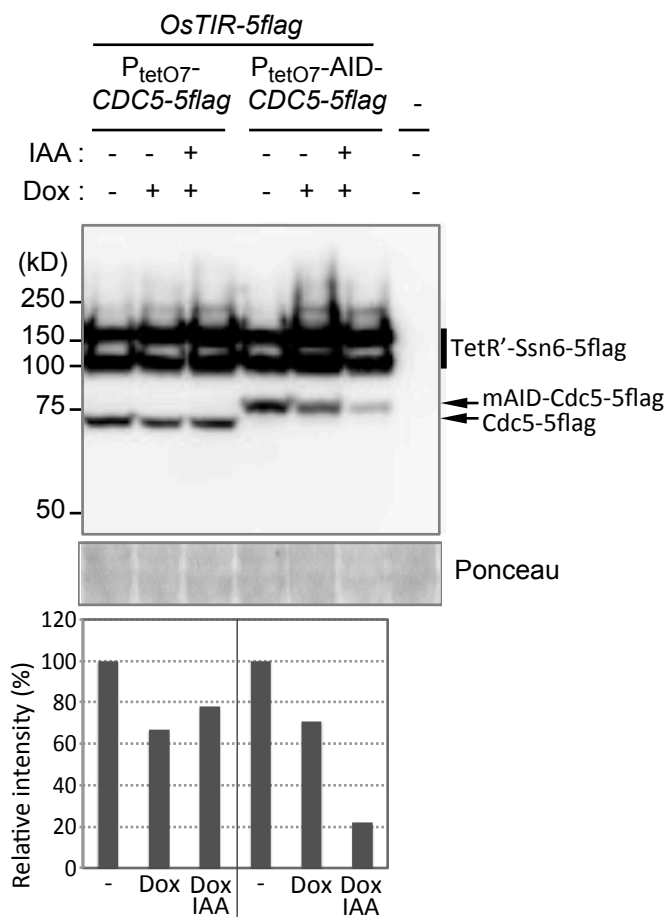

Figure S2 The iAID system in *O. polymorpha*

(A) Cdc5 protein levels expressed from the modified tetracycline-responsive promoters. Cdc5-5flag protein was exogenously expressed from TetO7-TATA<sub>ScCYC1</sub> promoter or TetO7-TATA<sub>OpACT1</sub> promoter in wild type cells expressing TetR-VP16. Total cell extracts were prepared and subjected to a western analysis using anti-flag antibody. Three and four independent clones of HPH1942 and HPH1943, respectively, were analysed. No plasmid: wild type cells not carrying the *OpCDC5-5flag* plasmid (HPH656). Cdc5-5flag protein was not detected when expressed from TetO7-TATA<sub>ScCYC1</sub> promoter.

(B) Cdc5-5flag, Spc72-5flag, or GFP-5flag protein level expressed from the TetO7 promoter in the presence of doxycycline. CDC5-5flag (HPH2004), SPC72-5flag (HPH2008), or GFP-5flag (HPH2009) genes were placed under TetO7-TATA<sub>OpACT1</sub> promoter in wild type cells carrying P<sub>CMV</sub>-tTA, P<sub>OpTEF1</sub>-*TetR*'-*OpSSN6-5flag*. Cells were pre-cultured in YPDS at 30 °C, then doxycycline was added at the indicated concentration and incubated for 5 h at 30 °C. Total cell extracts were prepared and subjected to a western analysis using anti-flag antibody. Note that the two slowest migrating bands correspond to the TetR'-Ssn6-5flag. No-tag: wild type (HPH951). Intensity of bands was quantified with ImageJ software.

(C) The *SPC72* RNA expression level. Wild type cells carrying P<sub>TetO7</sub>-*OpSPC72-5flag*, tTA, and P<sub>OpTEF1</sub>-*TetR*'-*OpSSN6-5flag* (HPH2008) were grown in YPDS. Doxycycline was added at indicated concentration and cells were incubated at 30 °C for 7 h. Total RNAs were subjected to qRT-PCR analysis for *SPC72* RNA and *ACT1* RNA. Relative expression to that without doxycycline was calculated. The experiment was performed in triplicate and the combined results are shown.

(D) Cdc5 protein level expressed by the iAID<sup>Op</sup> system. Wild type diploid cells carrying either P<sub>TetO7</sub>-*CDC5-5flag* (HPH2044) or P<sub>TetO7</sub>-*mAID-CDC5-5flag* (HPH2046) as well as P<sub>ADH1</sub>-*OsTIR*, P<sub>CMV</sub>-tTA, P<sub>OpTEF1</sub>-*TetR*'-*OpSSN6-5flag* and wild type haploid cells were grown in SD medium supplemented with appropriate nucleotide and amino acids in the presence or absence of 20 mg/mL doxycycline. IAA and 1NM-PP1 were added at 0.5 mM and incubated at 30 °C for 2.5 h. Total cell extracts were prepared and subjected to a western analysis using anti-flag antibody. Intensity of bands was quantified with ImageJ software. Similar result was shown in Fig. S4.

Figure S3

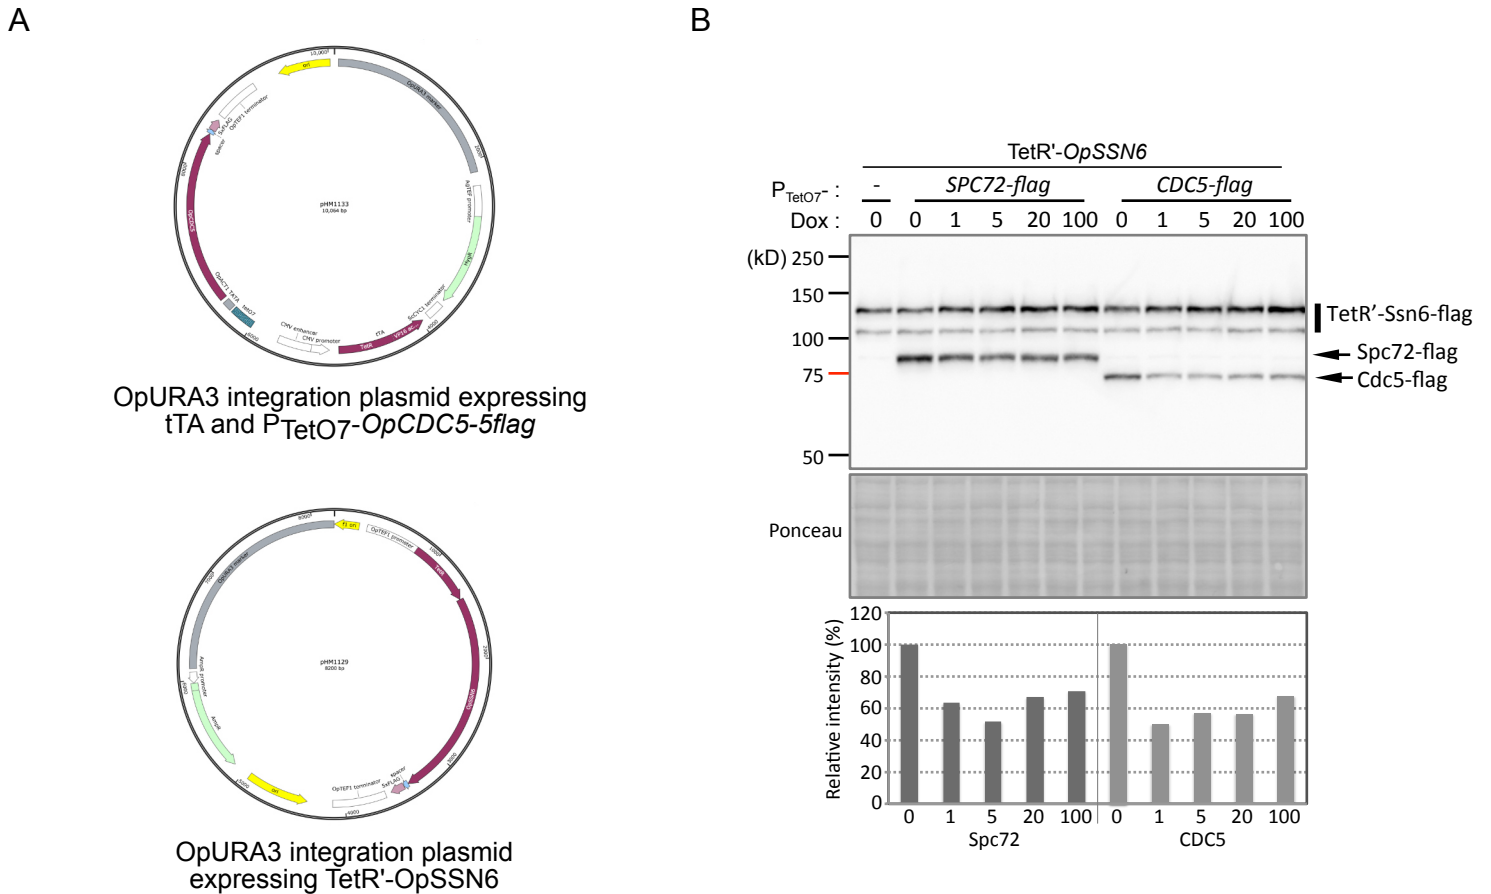

Figure S3 Tet-OFF system in *O. polymorpha*

(A) Schematic maps of the plasmids used to construct the *OpCDC5* Tet-OFF strain. Both pHM1129 and pHM1133 plasmids were integrated into *OpURA3* locus. The maps were drawn with SnapGene.

(B) Cdc5-5flag and Spc72-5flag protein level expressed from the TetO7 promoter in the presence of doxycycline. *CDC5-5flag* (HPH2004) and *SPC72-5flag* (HPH2008) genes were placed under the TetO7-TATA<sub>OpACT1</sub> promoter in wild type cells carrying P<sub>CMV</sub>-tTA, P<sub>OpTEF1</sub>-TetR'-OpSSN6-5flag. Cells were pre-cultured in YPDS at 30 °C, then doxycycline was added at the indicated concentration and incubated for 5 h at 30 °C. Total cell extracts were prepared and subjected to a western analysis using anti-flag antibody. Wild type cells carrying P<sub>OpTEF1</sub>-TetR'-OpSSN6-5flag (HPH1926) was used as the negative control. Note that the two slowest migrating bands correspond to the TetR'-Ssn6-5flag. Intensity of bands was measured with ImageJ. Addition of doxycycline efficiently lowered the level of OpCDC5-flag and OpSPC72-flag proteins.

Figure S4

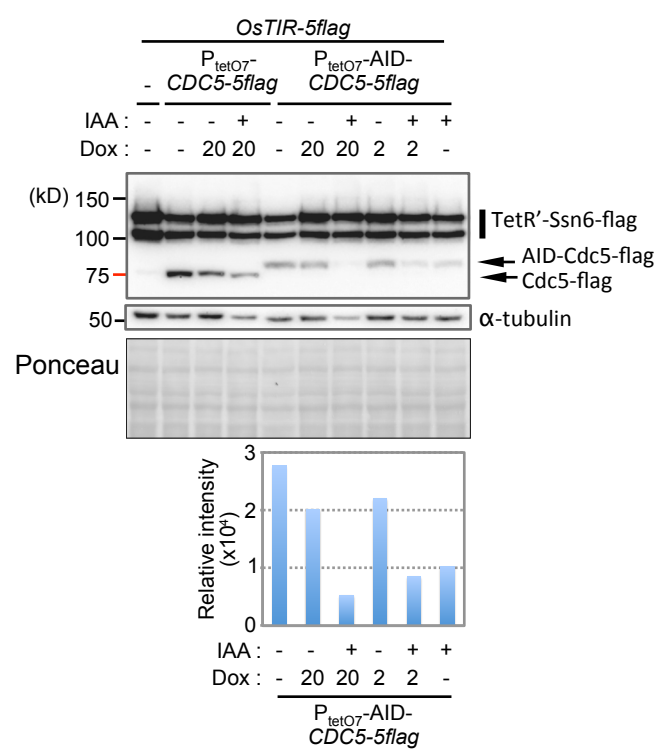

Figure S4 Regulation of *CDC5-5flag* expression by the iAID<sup>Op</sup> system

Cdc5 protein level expressed by the iAID<sup>Op</sup> system. Wild type diploid cells carrying either  $P_{tetO7}$ -*CDC5-5flag* (HPH2049) or  $P_{tetO7}$ -*mAID-CDC5-5flag* (HPH2053) as well as  $P_{ADH1}$ -*OsTIR*,  $P_{CMV}$ -tTA,  $P_{OpTEF1}$ -*TetR'-OpSSN6-5flag* and wild type diploid cells carrying  $P_{ADH1}$ -*OsTIR* and  $P_{OpTEF1}$ -*TetR'-OpSSN6-5flag* were grown in SD medium supplemented with appropriate nucleotide and amino acids in the presence of doxycycline at the indicated concentration. IAA was added at 0.5 mM and incubated at 30 °C for 2.5 h. Total cell extracts were prepared and subjected to a western analysis using anti-flag antibody. Intensity of bands was quantified with ImageJ software. In the presence of IAA and doxycycline, the mAID-Cdc5-flag protein was depleted by ~80%.

Figure S5

Result of pblast for *O. polymorpha* model proteins

Query: ScCdc15

|   | Protein ID | Location                   | Score | EValue    | %Indt. | %Subj.Cov. | Sc homologue   | gene name<br>(this study) |
|---|------------|----------------------------|-------|-----------|--------|------------|----------------|---------------------------|
| 1 | 52717      | scaffold_7:244619-245632   | 513   | 1.47E-040 | 40.4   | 75.7       | <i>ScBCK1</i>  | <i>OpBCK1</i>             |
| 2 | 17280      | scaffold_6:890165-892861   | 508   | 3.40E-048 | 42.2   | 50.4       | -              | <i>OpHCD1</i>             |
| 3 | 23749      | scaffold_3:338716-340286   | 488   | 3.01E-37  | 48.7   | 39.2       | -              | <i>OpHCD2</i>             |
| 4 | 16151      | scaffold_3:565100-568382   | 445   | 1.14E-039 | 43.9   | 28.9       | <i>ScSTE11</i> | <i>OpSTE11</i>            |
| 5 | 15344      | scaffold_1:1061265-1064094 | 439   | 7.34E-039 | 38.1   | 31.2       | <i>ScSTE20</i> | <i>OpSTE20</i>            |
| 6 | 52579      | scaffold_7:581327-582064   | 438   | 1.36E-034 | 47.3   | 68.7       | <i>ScKIC1</i>  | <i>OpKIC1</i>             |

Figure S5. Result of BLAST search using blastp for *O. polymorpha* model proteins at the genome portal of the Department of Energy Joint Genome Institute (<https://mycocosm.jgi.doe.gov/Hanpo2/Hanpo2.home.html>) [6]

Figure S6

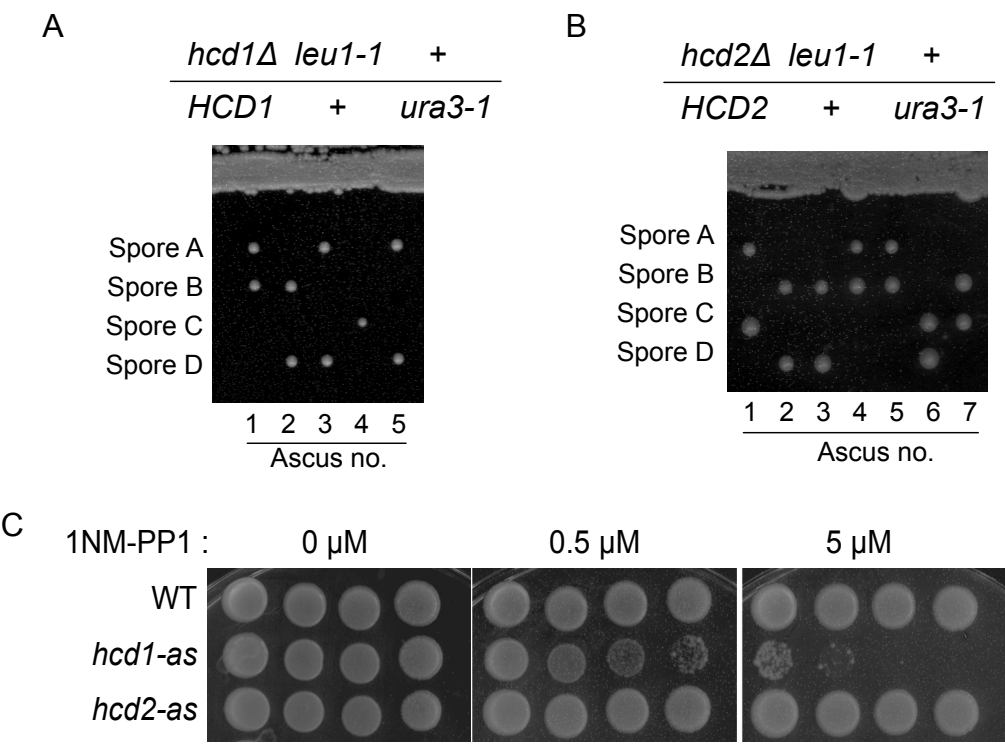

Figure S6      *OpHCD1* and *OpHCD2* are essential for growth

(A) Tetrad analysis of heterozygous *hcd1Δ/+* diploid cells (HPH1834). Cells were incubated on an MAME sporulation plate before dissection of spores. Two or fewer colonies were formed in all tetrads.

(B) Tetrad analysis of heterozygous *hcd2Δ/+* diploid cells (HPH2251). Cells were incubated on an MAME sporulation plate before dissection of spores. Two or fewer colonies were formed in all tetrads.

(C) Growth assay of the *hcd1-as* and *hcd2-as* mutants. Serial dilutions of wild type (HPH954), *hcd1-as* (HPH1894), and *hcd2-as* (HPH1909) strains were spotted on YPDS agar plates containing the indicated concentration of 1NM-PP1 and incubated at 30 °C.

Figure S7

A

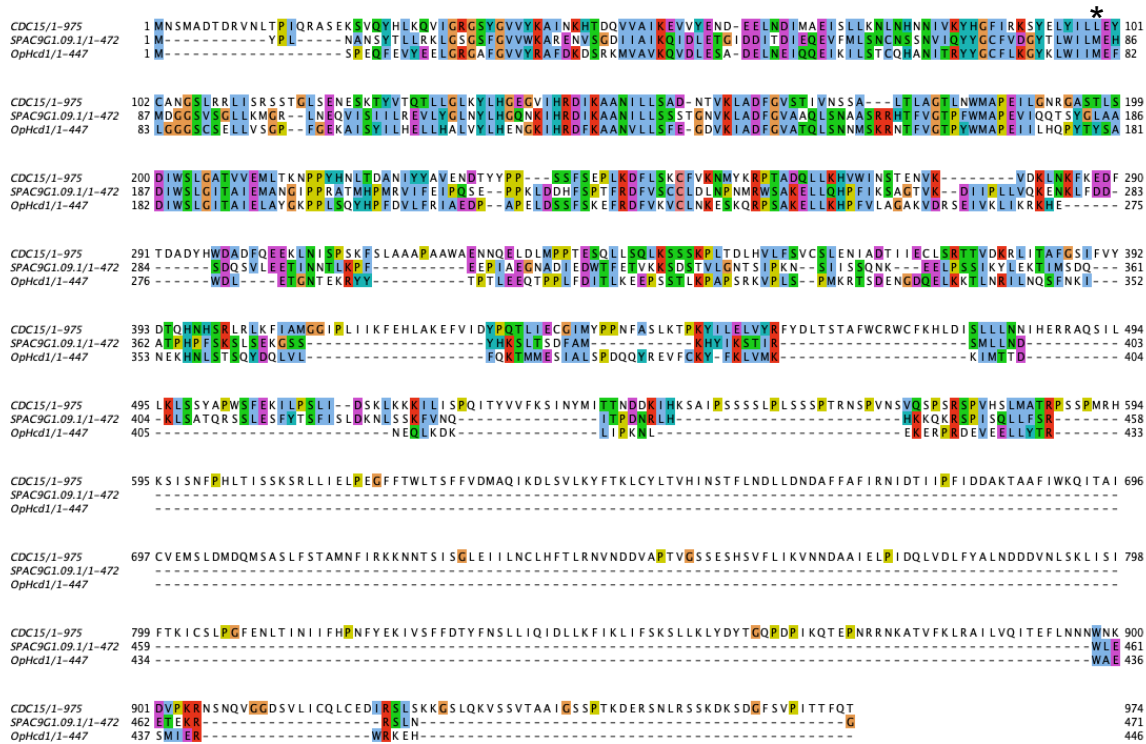

B

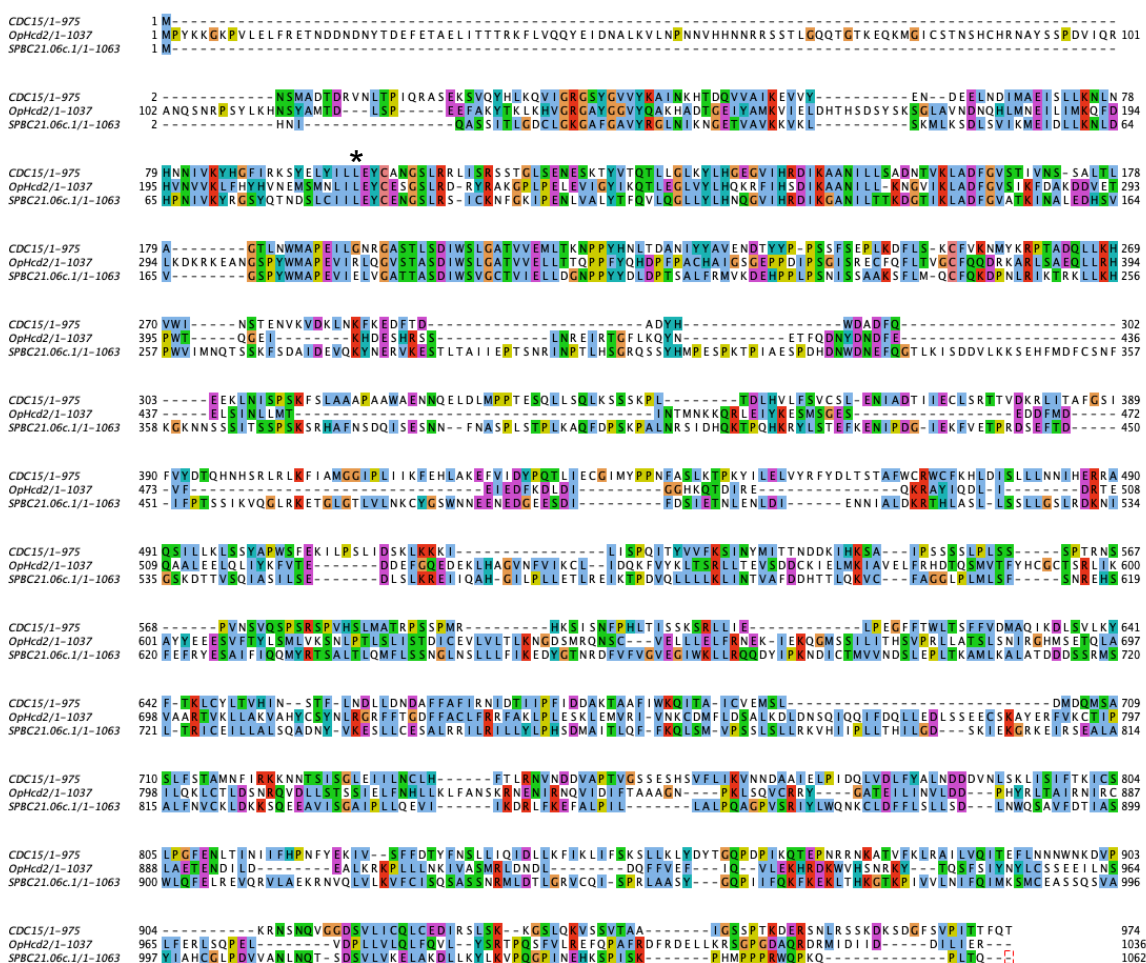

Figure S7. Amino acid alignments of OpHcd1, OpHcd2, ScCdc15, SpCdc7, and SpSid1. Amino acid sequences of OpHcd1, ScCdc15, and SpSid1 (A) or OpHcd2, ScCdc15, and SpCdc7 (B) were aligned with MafftWS by Jalview 2.8.2 [54]. Asterisks indicate the position of the amino acid of ScCdc15 whose mutation to glycine caused the ATP-analog 1NM-PP1 sensitivity.



Figure S8

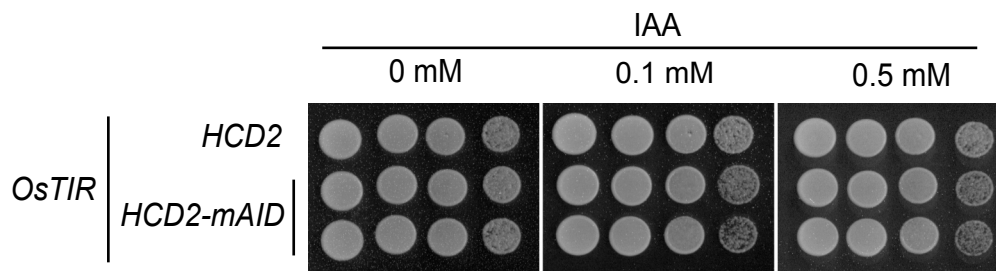

Figure S8. Growth assay of the *hcd2-mAID* mutant.

Serial dilutions of wild type (HPH1319), *hcd2-mAID* (HPH1599, HPH1600) strains were spotted on YPDS agar plates containing the indicated concentration of IAA and incubated at 30 °C.

A

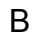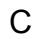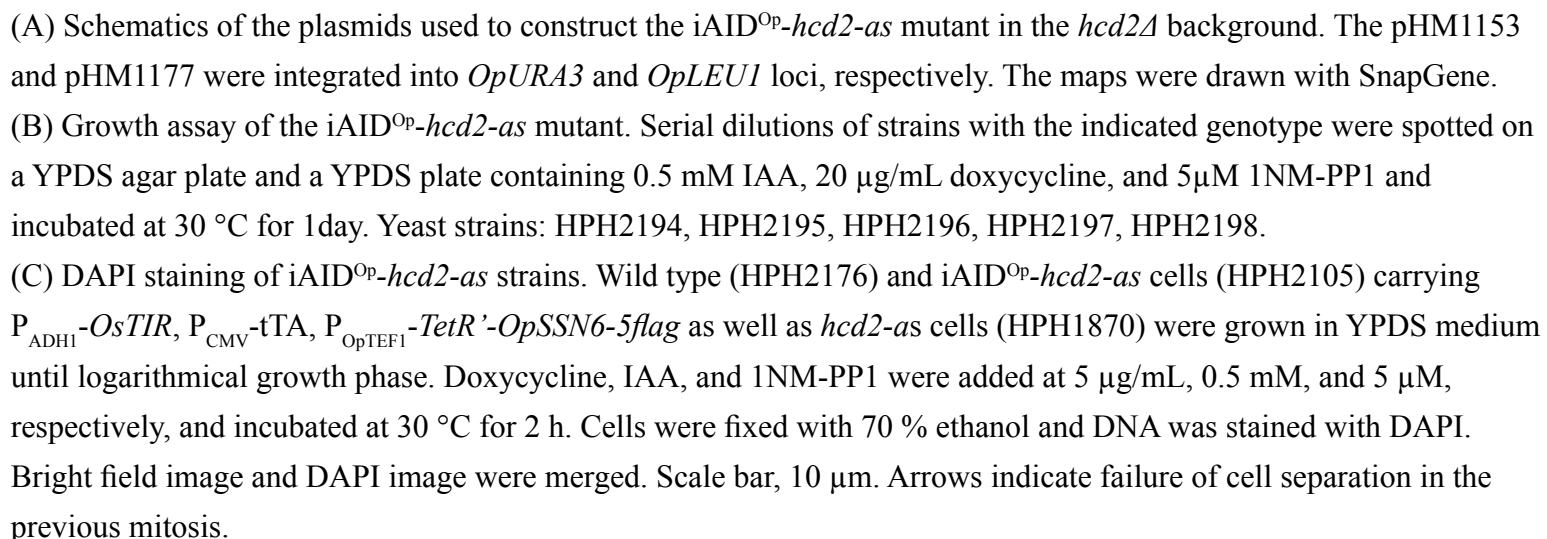

Figure S10

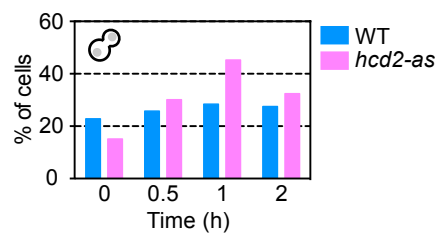

Figure S10. *hcd2-as* cells transiently accumulated late mitotic cells after addition of 1NM-PP1

Logarithmically growing wild type (HPH2186) and *hcd2-as* (HPH1870) cells in YPDS medium were incubated with 5  $\mu$ M 1NM-PP1 at 30 °C. Cells were fixed with 70% ethanol and DNA was stained with DAPI. The graph shows the percentage of large budded cells with two nuclei, one in the mother and the other in the bud, which represents the late mitotic stage. More than 100 cells were analysed at each time point.

Table S1 Yeast strains and plasmids

| Name                 | Genotype/construction                                                                                                                              | Source     |
|----------------------|----------------------------------------------------------------------------------------------------------------------------------------------------|------------|
| <b>Yeast strains</b> |                                                                                                                                                    |            |
| HPH656               | ku80Δ::zeo leu1-1 ura3-1                                                                                                                           | lab stock  |
| HPH951               | ku80Δ::hphNT1 ade12-cr3 ura3-1                                                                                                                     | lab stock  |
| HPH1047              | wild type                                                                                                                                          | lab stock  |
| HPH1319              | ku80Δ::zeo ura3-1<<P <sub>TEF1</sub> -OsTIR-URA3                                                                                                   | lab stock  |
| HPH1497              | CDC14-GFP-hphNT1 Δku80::zeo ura3-1                                                                                                                 | This study |
| HPH1599              | HCD2-3mAID-natNT2 ku80Δ::zeo ura3-1<<P <sub>TEF1</sub> -OsTIR-URA3                                                                                 | This study |
| HPH1600              | HCD2-3mAID-natNT2 ku80Δ::zeo ura3-1<<P <sub>TEF1</sub> -OsTIR-URA3                                                                                 | This study |
| HPH1605              | HCD1-GFP-hphNT1 MPS3-mRFP-kanMX6 ura3-1                                                                                                            | This study |
| HPH1608              | HCD2-GFP-hphNT1 MPS3-mRFP-kanMX6                                                                                                                   | This study |
| HPH1714              | HCD2-GFP-hphNT1 MPS3-mRFP-kanMX6 Δbub2::natNT2                                                                                                     | This study |
| HPH1719              | CDC14-GFP-hphNT1 CDC5-3mAID-natNT2 Δku80::zeo ura3-1<<TEF1promoter-OsTIR-URA3                                                                      | This study |
| HPH1721              | CDC14-GFP-hphNT1 TEM1-3mAID-natNT2 Δku80::zeo ura3-1<<TEF1promoter-OsTIR-URA3                                                                      | This study |
| HPH1737              | hcd1Δ::hphNT1/+ ku80Δ::zeo/ku80Δ::zeo leu1-1/+ +/ura3-1                                                                                            | This study |
| HPH1738              | hcd2Δ::natNT2/+ ku80Δ::zeo/ku80Δ::zeo leu1-1/+ +/ura3-1                                                                                            | This study |
| HPH1761              | BFA1-GFP-hphNT1 MPS3-mRFP-kanMX6 ade12-cr3                                                                                                         | This study |
| HPH1769              | HCD2-GFP-hphNT1 CDC5-3mAID-natNT2 Δku80::zeo ura3-1<<TEF1promoter-OsTIR-URA3 MPS3::HpMPS3-mRFP-HpkanMX                                             | This study |
| HPH1834              | hcd1Δ::hphNT1/+ ku80Δ::zeo/ku80Δ::zeo leu1-1/+ +/ura3-1 pHM898(Ku80+-OpKanMX6)                                                                     | This study |
| HPH1870              | hcd2Δ::natNT2<<Ophcd2-as(L215G)-hphNT1(pHM1121) ku80Δ::zeo ura3-1 pHM898(Ku80+-OpKanMX6)                                                           | This study |
| HPH1894              | hcd1Δ::hphNT1<<Ophcd1-as(M80G)-natNT2(pHM1119)                                                                                                     | This study |
| HPH1909              | hcd2Δ::natNT2<<Ophcd2-as(L215G)-hphNT1(pHM1121) ku80Δ::zeo                                                                                         | This study |
| HPH1926              | ura3-1::URA3-OpTEF1pro-TetR'-OpSSN6(pHM1129) ku80Δ::zeo                                                                                            | This study |
| HPH1942              | ku80Δ::zeo leu1-1 ura3-1::pHM1132                                                                                                                  | This study |
| HPH1943              | ku80Δ::zeo leu1-1 ura3-1::pHM1133                                                                                                                  | This study |
| HPH1956              | HCD2-GFP-hphNT1MPS3-mRFP-kanMX6 TEM1<<TEM1(E70L)-5flag-natNT2                                                                                      | This study |
| HPH1968              | GFP-TUB1-OpKanMX (HPH1047)                                                                                                                         | This study |
| HPH1969              | hcd1Δ::hphNT1<<Ophcd1-as(M80G)-natNT2(pHM1119) GFP-TUB1-OpKanMX(pHM933)                                                                            | This study |
| HPH2004              | ura3-1::URA3-OpTEF1pro-TetR'-OpSSN6(pHM1129)::pHM1133 ku80Δ::zeo                                                                                   | This study |
| HPH2008              | ura3-1ura3-1::URA3-OpTEF1pro-TetR'-OpSSN6(pHM1129)::pHM1143 ku80Δ::zeo                                                                             | This study |
| HPH2009              | ura3-1::URA3-OpTEF1pro-TetR'-OpSSN6(pHM1129)::pHM1145 Δku80::zeo                                                                                   | This study |
| HPH2042              | ku80Δ::zeo ura3-1 ade12-cr3::P <sub>ADH1</sub> -OsTIR-9myc-natNT2(pHM1147) TEF1::OpTEF1pro-TetR'-OpSSN6-URA3 (pHM1129)                             | This study |
| HPH2044              | ku70Δ::natNT2 ura3-1::P <sub>TEF1</sub> -CDC5-5flag-URA3(pHM1141) leu1-1                                                                           | This study |
| HPH2046              | ku70Δ::natNT2 ura3-1::P <sub>TEF1</sub> -mAID-CDC5-5flag-URA3(pHM1152) leu1-1                                                                      | This study |
| HPH2049              | (ku70Δ::natNT2 ura3-1::P <sub>TEF1</sub> -CDC5-5flag-URA3(pHM1141) leu1-1) / (ku80Δ::hphNT1 ura3-1 ade12-cr3::pHM1147 TEF1::pHM1129), diploid      | This study |
| HPH2053              | (ku70Δ::natNT2 ura3-1::P <sub>TEF1</sub> -mAID-CDC5-5flag-URA3(pHM1152) leu1-1) x (ku80Δ::hphNT1 ura3-1 ade12-cr3::pHM1147 TEF1::pHM1129), diploid | This study |
| HPH2067              | Δhcd2::natNT2 ku80Δ::zeo URA3::P <sub>TEF1</sub> -mAID-hcd2-as-hphNT1-URA3(pHM1153) leu1-1 Ku80+-OpKanMX (pHM898)                                  | This study |

|         |                                                                                                                                                                                            |            |
|---------|--------------------------------------------------------------------------------------------------------------------------------------------------------------------------------------------|------------|
| HPH2105 | ku80Δ::zeo ura3-1 ade12-cr3::pHM1147 TEF1::pHM1129                                                                                                                                         | This study |
| HPH2108 | MOB1-GFP-hphNT1 MPS3-mRFP-OpKanMx(pHM968-1) Δku80::zeo ura3-1                                                                                                                              | This study |
| HPH2194 | ku80Δ::zeo Δhcd2::natNT2 URA3::P <sub>tef1</sub> -mAID-hcd2-as-hphNT1-URA3(pHM1153) leu1-1<<ADH1p-OsTIR-TEF1p-TetR'-Ssn6-OpLEU1(pHM1177) Ku80+-OpKanMX (pHM898)                            | This study |
| HPH2195 | ku80Δ::zeo Δhcd2::natNT2 URA3::P <sub>tef1</sub> -mAID-hcd2-as-hphNT1-URA3(pHM1153) leu1-1::P <sub>ADH1</sub> -OsTIR, P <sub>TEF1</sub> -TetR'-Ssn6-OpLEU1(pHM1177) Ku80+-OpKanMX (pHM898) | This study |
| HPH2196 | ku80Δ::zeo ΔCD2 URA3::P <sub>tef1</sub> -mAID-hcd2-as-hphNT1-URA3(pHM1153) leu1-1::P <sub>ADH1</sub> -OsTIR, P <sub>TEF1</sub> -TetR'-Ssn6-OpLEU1(pHM1177)) Ku80+-OpKanMX (pHM898)         | This study |
| HPH2197 | ku80Δ::zeo Δhcd2::natNT2 URA3::P <sub>tef1</sub> -mAID-hcd2-as-hphNT1-URA3(pHM1153) Ku80+-OpKanMX (pHM898)                                                                                 | This study |
| HPH2198 | ku80Δ::zeo Δhcd2::natNT2 URA3::P <sub>tef1</sub> -mAID-hcd2-as-hphNT1-URA3(pHM1153) Ku80+-OpKanMX (pHM898)                                                                                 | This study |
| HPH2244 | ku80Δ::zeo Δhcd2::natNT2 URA3::P <sub>tef1</sub> -mAID-hcd2-as-hphNT1-URA3(pHM1153) leu1-1::P <sub>ADH1</sub> -OsTIR, P <sub>TEF1</sub> -TetR'-Ssn6 (pHM1198-1) Ku80+-OpKanMX (pHM898)     | This study |
| HPH2245 | ku80Δ::zeo Δhcd2::natNT2 URA3::P <sub>tef1</sub> -mAID-hcd2-as-hphNT1-URA3(pHM1153) leu1-1::P <sub>ADH1</sub> -OsTIR(F74A), P <sub>TEF1</sub> -TetR'-Ssn6 (pHM1200) Ku80+-OpKanMX (pHM898) | This study |
| HPH2246 | ku80Δ::zeo leu1-1::P <sub>ADH1</sub> -OsTIR(F47G), P <sub>TEF1</sub> -TetR'-Ssn6, LEU1(pHM1198-2) ura3-1                                                                                   | This study |
| HPH2247 | ku80Δ::zeo leu1-1::P <sub>ADH1</sub> -OsTIR(F47A), P <sub>TEF1</sub> -TetR'-Ssn6 LEU1 (pHM1198-2) ura3-1                                                                                   | This study |
| HPH2251 | hcd2Δ::natNT2/+ ku80Δ::zeo/ku80Δ::zeo leu1-1/+ +/ura3-1 Ku80+-OpKanMX (pHM898), diploid                                                                                                    | This study |
| HPH2254 | ku80Δ::zeo leu1-1::P <sub>ADH1</sub> -OsTIR, P <sub>TEF1</sub> -TetR'-Ssn6, LEU1 (pHM1198-1) ura3-1                                                                                        | This study |
| HPH2258 | ku80Δ::zeo leu1-1::P <sub>ADH1</sub> -OsTIR(F47A), P <sub>TEF1</sub> -TetR'-Ssn6(pHM1198-2) TUB1::pHM1136 ura3-1                                                                           | This study |
| HPH2260 | ku80Δ::zeo Δhcd2::natNT2 URA3::P <sub>tef1</sub> -mAID-hcd2-as-hphNT1-URA3(pHM1153) ade12-cr3::P <sub>ADH1</sub> -OsTIR(F74A), P <sub>TEF1</sub> -TetR'-Ssn6 (pHM1201) TUB1::pHM1136       | This study |
| HPH2270 | ku80Δ::zeo Δhcd2::natNT2 URA3::P <sub>tef1</sub> -mAID-hcd2-as-hphNT1-URA3(pHM1153) leu1-1::P <sub>ADH1</sub> -OsTIR, P <sub>TEF1</sub> -TetR'-Ssn6 (pHM1198-1) Ku80+-OpKanMX (pHM898)     | This study |

## plasmids

|           |                                                                                                                                          |            |
|-----------|------------------------------------------------------------------------------------------------------------------------------------------|------------|
| pHM898    | OpURA3-hphNT1-based integration plasmid carrying OpKU80+                                                                                 | This study |
| pHM933    | pFA6a plasmid carrying P <sub>OptEF1</sub> -kanMX6 and P <sub>OptUB1</sub> -GFP-OpTUB1                                                   | This study |
| pHM1119   | pFA6a-natNT2 plasmid carrying Ophcd1 <sup>M80G</sup>                                                                                     | This study |
| pHM1121   | pFA6a-hphNT1 plasmid carrying Ophcd2 <sup>L215G</sup>                                                                                    | This study |
| pHM1129   | pFA6a-hphNT1 plasmid carrying TetR'-OpSSN6                                                                                               | This study |
| pHM1133   | OpURA3-hphNT1-based integration plasmid carrying rtTA, P <sub>tef1</sub> -CDC5-5flag                                                     | This study |
| pHM1136   | pFA6a plasmid carrying P <sub>OptEF1</sub> -kanMX6, P <sub>OptUB1</sub> -GFP-OpTUB1, histoneH3-mCherry-histoneH4                         | This study |
| pHM1141   | OpURA3-hphNT1-based integration plasmid carrying rtTA, P <sub>tef1</sub> -CDC5-5flag-URA3                                                | This study |
| pHM1143   | OpURA3-hphNT1-based integration plasmid carrying rtTA, P <sub>tef1</sub> -SPC72-5flag-URA3                                               | This study |
| pHM1145   | OpURA3-hphNT1-based integration plasmid carrying rtTA, P <sub>tef1</sub> -GFP-5flag-URA3                                                 | This study |
| pHM1147   | natNT2 based integration plasmid carrying the N-terminal and upstream fragment of OpADE12, P <sub>ADH1</sub> -OsTIR-9myc-natNT2(pHM1147) | This study |
| pHM1152   | OpURA3-hphNT1-based integration plasmid carrying rtTA, P <sub>tef1</sub> -mAID-CDC5-5flag                                                | This study |
| pHM1153   | OpURA3-hphNT1-based integration plasmid carrying rtTA, P <sub>tef1</sub> -mAID-hcd2 <sup>L215G</sup> -5flag                              | This study |
| pHM1177   | OpLEU1-based integration plasmid carrying P <sub>ADH1</sub> -OsTIR, P <sub>TEF1</sub> -TetR'-OpSSN6                                      | This study |
| pHM1198-1 | OpLEU1-based integration plasmid carrying P <sub>ADH1</sub> -OsTIR, P <sub>TEF1</sub> -TetR'-OpSSN6                                      | This study |
| pHM1198-2 | OpLEU1-based integration plasmid carrying P <sub>ADH1</sub> -OsTIR(F74G), P <sub>TEF1</sub> -TetR'-OpSSN6                                | This study |
| pHM1200   | OpLEU1-based integration plasmid carrying P <sub>ADH1</sub> -OsTIR(F74A), P <sub>TEF1</sub> -TetR'-OpSSN6                                | This study |
| pHM1201   | OpADE12-based integration plasmid carrying P <sub>ADH1</sub> -OsTIR(F74A), P <sub>TEF1</sub> -TetR'-OpSSN6                               | This study |
